# Supplementary material for: Triple responsive room temperature luminescence, photochromism and photomagnetism in a Dy(iii)-based linear chain complex
Source: Royal Society of Chemistry journal article supplement (doi:10.1039/d0ce01268h), 2020-01-01
Supplement: d0ce01268h1.pdf [file d0ce01268h1.pdf]

## Supporting Information

### Contents

#### Experimental Section

Figure S1. Simulated(black), before(red) and after(blue) irradiated PXRD patterns of **1**.

Figure S2. The TG plot of **1**.

Figure S3. IR spectra of **1** before (black) and after (red) light irradiation.

Figure S4 Color changes of the powder samples for **1** upon light and heating/dark treatment.

Figure S5 Fluorescence spectrum of TPB ligand at solid state.

Figure S6 The switching of photoinduced coloration and decoloration process in five cycles.

Figure S7 EPR spectra of **1** at 110 K at a frequency of 9.41 GHz.

Figure S8 Plots of  $\chi T$  vs  $T$  of **1** after decoloration under a dc field of 1000 Oe.

Table S1. Crystallographic data for **1** at 293 K.

Table S2. CShM analyses of geometries for compound **1**.

Table S3. Selected bond lengths (Å) and angles (°) for **1** at 293 K.

## Experimental Section

### Materials and methods

All chemicals were reagent grade and used as purchased without further purification, including the organic amine 1,3,5-tris(4-pyridyl)benzene (TPB) and hydroxyethylidene diphosphonate (HEDP).

**Synthesis of 1:** Dy<sub>2</sub>O<sub>3</sub> (0.09 g, 0.4 mmol), TPB (0.03 g, 0.01 mmol), 60% HEDP (0.3 mL, 0.7 mmol), and 5 mL H<sub>2</sub>O were added in a sealed Teflon-lined autoclave (20 mL), then heated to 120 °C for 7 days. After cooling for 4 hours at room temperature, yellow block crystals were obtained. Yield: ca. 37% based on TPB. Elemental analysis for compound **1** (%): Anal. calcd for C<sub>50</sub>H<sub>64</sub>N<sub>6</sub>O<sub>32</sub>P<sub>8</sub>Dy<sub>2</sub> (1833.83): C, 32.75; H, 3.52; N, 4.58; O, 27.92. Found: C, 35.55; H, 4.52; N, 4.82; O, 28.05. IR before irradiation (KBr pellets, cm<sup>-1</sup>): 3400(s), 3080(s), 2340(w), 2140(w), 1630(s), 1500(m), 1400(w), 1150(s), 1070(s), 926(s), 810(s), 654(m), 565(s), 447(m). IR after irradiation (KBr pellets, cm<sup>-1</sup>): 3410(s), 3090(s), 2330(w), 2150(w), 1630(s), 1500(m), 1410(w), 1150(s), 1060(s), 932(s), 808(s), 655(m), 555(s), 443(m).

Elemental analyses (C, H, and N) were measured on a Perkin-Elmer 240C analyzer (Perkin-Elmer, USA). IR spectra of **1** were performed using a MAGNA-560 (Nicolet) FT-IR spectrometer with KBr pellets. The photoluminescence data were analyzed by an F-4700 Fluorescence spectrometer. The solid-state UV-Vis spectra were measured at RT using BaSO<sub>4</sub> as a reference on a Puxi Tu-1901 spectrophotometer. The electron paramagnetic resonance (EPR) spectroscopy was recorded on a Bruker E500 spectrometer using powder samples. Thermogravimetric (TG) analyses were measured using a powder sample under N<sub>2</sub> atmosphere on a TG-DTA 8121 analyzer. Magnetic measurements of the powder samples of **1** were carried out on a Quantum Design SQUID MPMS3 magnetometer. Data were corrected for the diamagnetic contribution calculated from Pascal constants. Through a Rigaku standard MiniFlex600 diffractometer, powder X-ray diffraction (PXRD)

spectra were performed. Simulation of the PXRD curve was carried out by the single-crystal data and diffraction-crystal module of the Mercury (Hg) program with free method supported on the Internet at <http://www.iucr.org>. For the light irradiation experiments, a Perfect Light PLS-SXE 300 Xe lamp (320–780 nm, 150 w, at least 60 min) was equipped to prepare the colored samples of UV-vis, PXRD ESR and magnetic studies.

#### **X-ray Crystallography.**

The single-crystal X-ray diffraction data of **1** was collected on a Rigaku SCX-mini diffractometer at 293(2) K with Mo-K $\alpha$  radiation ( $\lambda = 0.71073 \text{ \AA}$ ). SHELX-2016 software was used to solve the structure. Detailed crystallographic data for **1** was summarized in Table S1, and the selected bond lengths and angles were listed in Table S3. Full crystallographic data for **1** has been deposited with the CCDC (2024837).

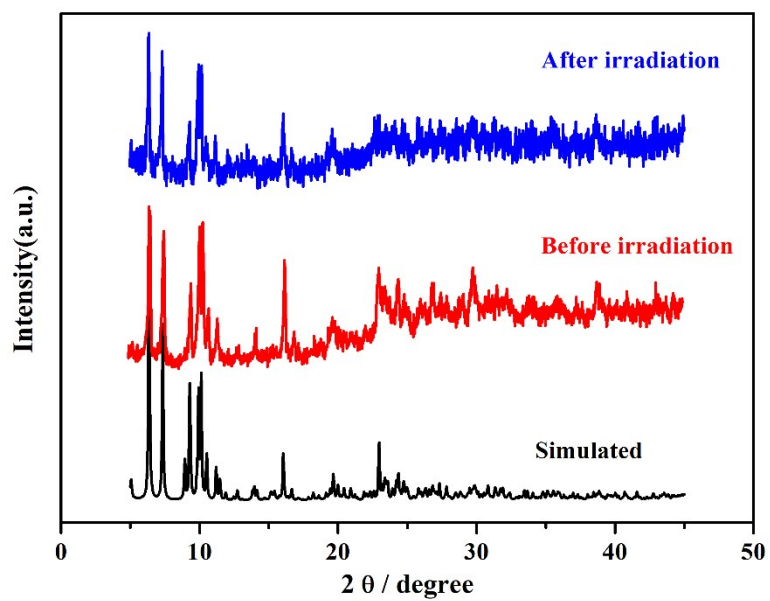

Figure S1 Simulated(black), before(red) and after(blue) irradiated PXRD patterns of **1**.

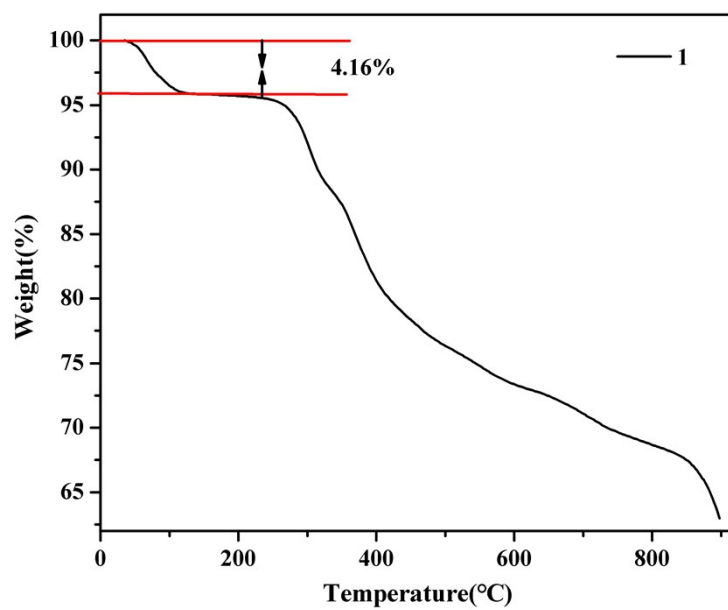

Figure S2 The TG plot of **1**.

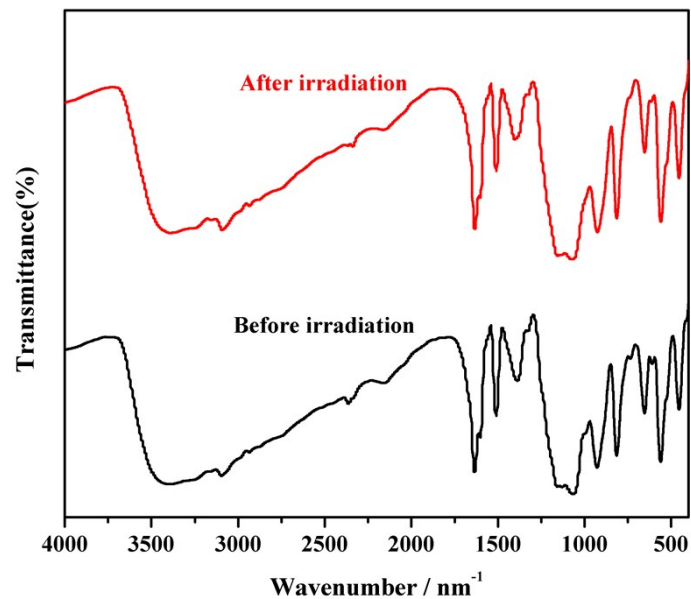

Figure S3 IR spectra of **1** before (black) and after (red) light irradiation.

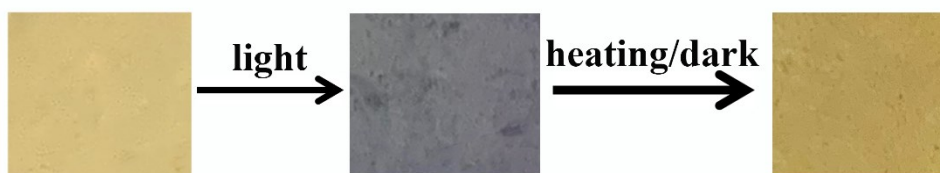

Figure S4 Color changes of the powder samples for **1** upon light and heating/dark treatment.

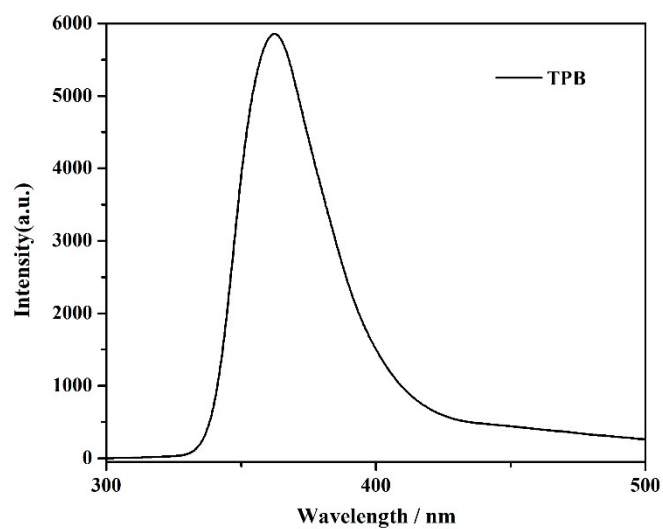

Figure S5 Fluorescence spectrum of TPB ligand at solid state.

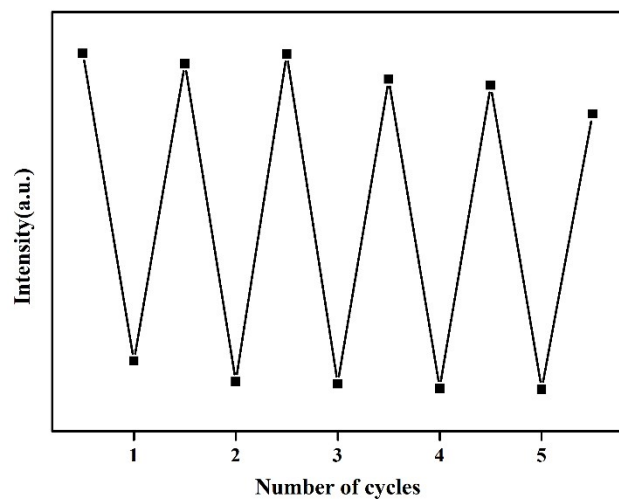

Figure S6 The switching of photoinduced coloration and decoloration process in five cycles.

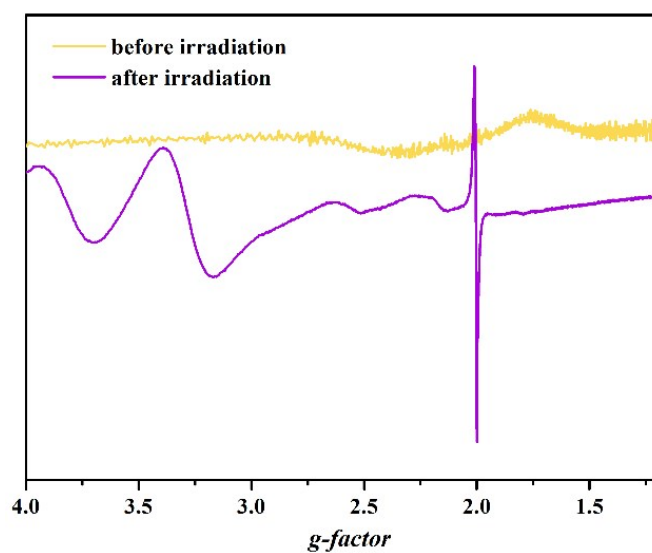

Figure S7 EPR spectra of **1** at 110 K at a frequency of 9.41 GHz.

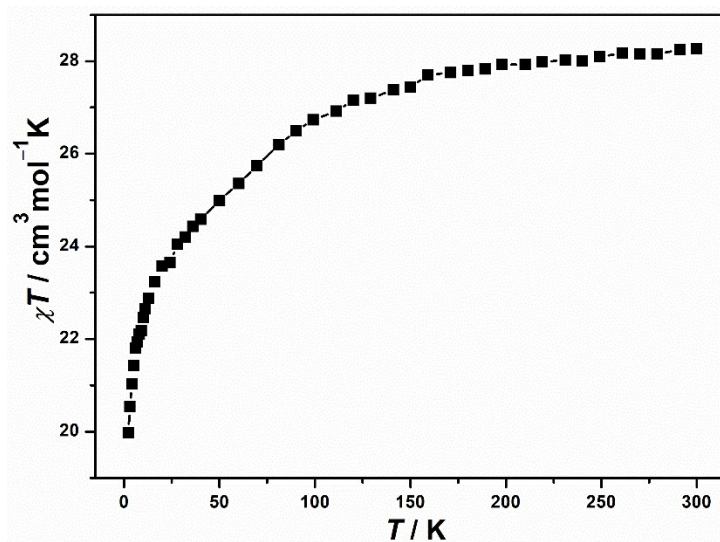

Figure S8 Plots of  $\chi T$  vs  $T$  of **1** after decoloration under a dc field of 1000 Oe. After the dark gray sample returned to the initial dark yellow one, the  $\chi T$  value at room temperature also increased to the initial one of  $28.23 \text{ cm}^3 \text{ mol}^{-1} \text{ K}$ .

**Table S1.** Crystallographic data for **1** at 293 K

| <b>1</b>                                                                    |                                                                                               |
|-----------------------------------------------------------------------------|-----------------------------------------------------------------------------------------------|
| Chemical formula                                                            | C <sub>50</sub> H <sub>64</sub> N <sub>6</sub> O <sub>32</sub> P <sub>8</sub> Dy <sub>2</sub> |
| <i>M</i> <sub>r</sub>                                                       | 1833.83                                                                                       |
| space group                                                                 | <i>P</i> $\bar{1}$                                                                            |
| Crystal system                                                              | Triclinic                                                                                     |
| <i>a</i> (Å)                                                                | 10.3969 (6)                                                                                   |
| <i>b</i> (Å)                                                                | 18.2975 (9)                                                                                   |
| <i>c</i> (Å)                                                                | 19.3503 (8)                                                                                   |
| <i>V</i> (Å <sup>3</sup> )                                                  | 3490.6 (3)                                                                                    |
| <i>Z</i>                                                                    | 2                                                                                             |
| <i>F</i> (000)                                                              | 1828                                                                                          |
| <i>D</i> <sub>c</sub> (gcm <sup>-3</sup> )                                  | 1.745                                                                                         |
| $\mu$ (mm <sup>-1</sup> )                                                   | 2.398                                                                                         |
| <i>R</i> <sub>int</sub>                                                     | 0.0339                                                                                        |
|                                                                             | -12 ≤ <i>h</i> ≤ 10                                                                           |
| limiting indices                                                            | -21 ≤ <i>k</i> ≤ 21                                                                           |
|                                                                             | -23 ≤ <i>l</i> ≤ 23                                                                           |
| Collected reflections                                                       | 19376                                                                                         |
| Unique reflections                                                          | 12281                                                                                         |
| GOF on <i>F</i> <sub>2</sub>                                                | 0.999                                                                                         |
| <i>R</i> <sub>1</sub> , <i>wR</i> <sub>2</sub> [ <i>I</i> > 2σ( <i>I</i> )] | 0.0381, 0.0876                                                                                |
| <i>R</i> <sub>1</sub> , <i>wR</i> <sub>2</sub> [all data]                   | 0.0576, 0.0952                                                                                |

<sup>a</sup>  $R_1 = \frac{\sum ||F_o| - |F_c||}{\sum |F_o|}$  . <sup>b</sup>  $wR_2 = \left\{ \frac{\sum [w(F_o^2 - F_c^2)^2]}{\sum w(F_o^2)^2} \right\}^{1/2}$



**Table S2.** Continuous Shape Measure (CShM) analyses of geometries for compound **1** by SHAPE 2.0 Software.

| Geometry                                                  | 1-Dy1  | 1-Dy2  |
|-----------------------------------------------------------|--------|--------|
| Heptagon(D <sub>7h</sub> )                                | 31.911 | 33.154 |
| Hexagonal pyramid(C <sub>6v</sub> )                       | 21.087 | 20.148 |
| Pentagonal bipyramid(D <sub>5h</sub> )                    | 6.663  | 5.720  |
| Capped octahedron(C <sub>3v</sub> )                       | 1.160  | 1.330  |
| Capped trigonal prism(C <sub>2v</sub> )                   | 0.341  | 0.436  |
| Johnson pentagonal bipyramid J13(D <sub>5h</sub> )        | 9.629  | 8.838  |
| Johnson elongated triangular pyramid J7(C <sub>3v</sub> ) | 19.328 | 19.996 |

**Table S3.** Selected bond lengths (Å) and angles (°) for **1** at 293 K

| <b>1</b>      |          |            |          |  |
|---------------|----------|------------|----------|--|
| C(43)–P(2)    | 1.841(5) | O(2)–P(2)  | 1.566(4) |  |
| C(43)–P(1)    | 1.836(5) | O(4)–P(1)  | 1.579(4) |  |
| C(45)–P(7)    | 1.842(5) | O(5)–P(1)  | 1.503(4) |  |
| C(45)–P(8)    | 1.847(5) | O(6)–P(2)  | 1.503(4) |  |
| C(47)–P(3)    | 1.829(6) | O(7)–P(1)  | 1.502(4) |  |
| C(47)–P(4)    | 1.859(6) | O(8)–P(3)  | 1.567(4) |  |
| C(49)–P(5)    | 1.831(6) | O(9)–P(3)  | 1.522(4) |  |
| C(49)–P(6)    | 1.850(5) | O(11)–P(4) | 1.559(4) |  |
| Dy(1)–O(5)#1  | 2.265(4) | O(12)–P(4) | 1.485(4) |  |
| Dy(1)–O(22)   | 2.262(3) | O(13)–P(3) | 1.496(4) |  |
| Dy(1)–O(14)   | 2.295(3) | O(14)–P(4) | 1.500(4) |  |
| Dy(1)–O(15)   | 2.314(4) | O(15)–P(5) | 1.510(4) |  |
| Dy(1)–O(1)#1  | 2.347(3) | O(16)–P(5) | 1.502(4) |  |
| Dy(1)–O(21)   | 2.370(4) | O(17)–P(5) | 1.549(4) |  |
| Dy(1)–O(13)   | 2.438(4) | O(19)–P(6) | 1.503(4) |  |
| Dy(2)–O(16)#2 | 2.236(4) | O(20)–P(6) | 1.534(4) |  |
| Dy(2)–O(28)   | 2.284(3) | O(21)–P(6) | 1.518(4) |  |
| Dy(2)–O(12)   | 2.279(4) | O(22)–P(8) | 1.506(4) |  |
| Dy(2)–O(19)#2 | 2.296(4) | O(23)–P(8) | 1.526(4) |  |
| Dy(2)–O(27)   | 2.350(4) | O(24)–P(7) | 1.580(4) |  |

|                       |            |                  |          |
|-----------------------|------------|------------------|----------|
| Dy(2)–O(6)            | 2.361(3)   | O(26)–P(7)       | 1.486(4) |
| Dy(2)–O(7)            | 2.403(4)   | O(27)–P(7)       | 1.499(4) |
| O(1)–P(2)             | 1.505(3)   | O(28)–P(8)       | 1.522(4) |
| O(5)#1–Dy(1)–O(22)    | 155.88(13) | O(7)–P(1)–C(43)  | 107.9(2) |
| O(5)#1–Dy(1)–O(14)    | 97.14(14)  | O(5)–P(1)–C(43)  | 105.7(2) |
| O(22)–Dy(1)–O(14)     | 85.32(13)  | O(4)–P(1)–C(43)  | 108.0(2) |
| O(5)#1–Dy(1)–O(15)    | 78.71(13)  | O(6)–P(2)–O(1)   | 116.5(2) |
| O(22)–Dy(1)–O(15)     | 124.84(13) | O(6)–P(2)–O(2)   | 109.8(2) |
| O(14)–Dy(1)–O(15)     | 75.82(13)  | O(1)–P(2)–O(2)   | 108.1(2) |
| O(5)#1–Dy(1)–O(1)#1   | 80.21(12)  | O(6)–P(2)–C(43)  | 109.3(2) |
| O(22)–Dy(1)–O(1)#1    | 87.12(12)  | O(1)–P(2)–C(43)  | 106.5(2) |
| O(14)–Dy(1)–O(1)#1    | 153.97(13) | O(2)–P(2)–C(43)  | 106.2(2) |
| O(15)–Dy(1)–O(1)#1    | 128.06(13) | O(13)–P(3)–O(9)  | 113.9(2) |
| O(5)#1–Dy(1)–O(21)    | 123.98(13) | O(13)–P(3)–O(8)  | 111.5(2) |
| O(22)–Dy(1)–O(21)     | 72.62(13)  | O(9)–P(3)–O(8)   | 106.3(2) |
| O(14)–Dy(1)–O(21)     | 122.12(13) | O(13)–P(3)–C(47) | 109.2(2) |
| O(15)–Dy(1)–O(21)     | 74.94(12)  | O(9)–P(3)–C(47)  | 108.1(3) |
| O(1)#1–Dy(1)–O(21)    | 78.79(12)  | O(8)–P(3)–C(47)  | 107.6(2) |
| O(5)#1–Dy(1)–O(13)    | 77.59(13)  | O(12)–P(4)–O(14) | 114.9(2) |
| O(22)–Dy(1)–O(13)     | 79.66(12)  | O(12)–P(4)–O(11) | 109.0(2) |
| O(14)–Dy(1)–O(13)     | 76.76(12)  | O(14)–P(4)–O(11) | 110.2(2) |
| O(15)–Dy(1)–O(13)     | 140.87(12) | O(12)–P(4)–C(47) | 106.2(2) |
| O(1)#1–Dy(1)–O(13)    | 77.39(12)  | O(14)–P(4)–C(47) | 109.4(2) |
| O(21)–Dy(1)–O(13)     | 144.06(12) | O(11)–P(4)–C(47) | 106.8(3) |
| O(16)#2–Dy(2)–O(28)   | 159.04(14) | O(16)–P(5)–O(15) | 114.1(2) |
| O(16)#2–Dy(2)–O(12)   | 91.17(14)  | O(16)–P(5)–O(17) | 108.0(3) |
| O(28)–Dy(2)–O(12)     | 83.26(13)  | O(15)–P(5)–O(17) | 110.6(2) |
| O(16)#2–Dy(2)–O(19)#2 | 79.62(13)  | O(16)–P(5)–C(49) | 106.0(2) |
| O(28)–Dy(2)–O(19)#2   | 97.88(13)  | O(15)–P(5)–C(49) | 107.7(2) |
| O(12)–Dy(2)–O(19)#2   | 157.17(14) | O(17)–P(5)–C(49) | 110.4(2) |
| O(16)#2–Dy(2)–O(27)   | 81.36(14)  | O(19)–P(6)–O(21) | 113.3(2) |
| O(28)–Dy(2)–O(27)     | 77.77(12)  | O(19)–P(6)–O(20) | 111.4(2) |
| O(12)–Dy(2)–O(27)     | 79.72(13)  | O(21)–P(6)–O(20) | 110.4(2) |
| O(19)#2–Dy(2)–O(27)   | 78.27(14)  | O(19)–P(6)–C(49) | 106.5(2) |
| O(16)#2–Dy(2)–O(6)    | 121.84(14) | O(21)–P(6)–C(49) | 107.9(2) |
| O(28)–Dy(2)–O(6)      | 77.14(12)  | O(20)–P(6)–C(49) | 107.0(2) |
| O(12)–Dy(2)–O(6)      | 124.84(13) | O(26)–P(7)–O(27) | 115.8(2) |
| O(19)#2–Dy(2)–O(6)    | 77.22(13)  | O(26)–P(7)–O(24) | 107.4(2) |
| O(27)–Dy(2)–O(6)      | 141.84(12) | O(27)–P(7)–O(24) | 110.8(2) |
| O(16)#2–Dy(2)–O(7)    | 78.78(13)  | O(26)–P(7)–C(45) | 109.2(2) |
| O(28)–Dy(2)–O(7)      | 117.89(12) | O(27)–P(7)–C(45) | 108.0(2) |
| O(12)–Dy(2)–O(7)      | 71.21(13)  | O(24)–P(7)–C(45) | 105.1(2) |
| O(19)#2–Dy(2)–O(7)    | 126.22(13) | O(22)–P(8)–O(28) | 111.5(2) |

|                  |            |                  |          |
|------------------|------------|------------------|----------|
| O(27)–Dy(2)–O(7) | 144.14(13) | O(22)–P(8)–O(23) | 110.7(2) |
| O(6)–Dy(2)–O(7)  | 73.76(12)  | O(28)–P(8)–O(23) | 110.5(2) |
| O(7)–P(1)–O(5)   | 117.2(2)   | O(22)–P(8)–C(45) | 107.4(2) |
| O(7)–P(1)–O(4)   | 110.4(2)   | O(28)–P(8)–C(45) | 109.2(2) |
| O(5)–P(1)–O(4)   | 107.2(2)   | O(23)–P(8)–C(45) | 107.4(2) |

Symmetry codes: #1 x-1, y, z; #2 x+1, y, z.
